# Supplementary material for: Metabolome in Tibialis and Soleus Muscles in Wild-Type and Pin1 Knockout Mice through High-Resolution Magic Angle Spinning 1H Nuclear Magnetic Resonance Spectroscopy
Source: MDPI journal article supplement (doi:10.3390/metabo14050262), 2024-05-06
Supplement: s1 [file s1]

## Content:

|                                                                                                                                                                   |           |
|-------------------------------------------------------------------------------------------------------------------------------------------------------------------|-----------|
| <b>Figure S1.</b> SO <sub>WT</sub> /TA <sub>WT</sub> fold change.                                                                                                 | page 2    |
| <b>Figure S2.</b> Feature correlation heatmap for SO <sub>WT</sub> and TA <sub>WT</sub> classes                                                                   | page 2    |
| <b>Figure S3.</b> Quality parameters for SO <sub>KO</sub> <i>vs</i> SO <sub>WT</sub> and for TA <sub>KO</sub> <i>vs</i> TA <sub>WT</sub> PLS-DA spectral analyses | page 3    |
| <b>Figure S4.</b> SO <sub>KO</sub> /SO <sub>WT</sub> and TA <sub>KO</sub> /TA <sub>WT</sub> fold change                                                           | page 4    |
| <b>Figure S5.</b> Quality parameters for SO <sub>KO</sub> , SO <sub>WT</sub> , TA <sub>KO</sub> and TA <sub>WT</sub> PLS-DA on deconvoluted signals               | page 4    |
| <b>Figure S6.</b> Pathway analysis comparing WT and <i>Pin1</i> KO metabolism.                                                                                    | page 5    |
| <b>Table S1.</b> List of <sup>1</sup> H and <sup>13</sup> C chemical shifts of metabolites in TA and SO muscles                                                   | pages 6-8 |
| <b>Table S2.</b> P-values from two-tailed t-test on deconvoluted metabolites signals                                                                              | page 9    |
| <b>Table S3.</b> Post-hoc tests for parametric ANOVA on deconvoluted signals of the four classes                                                                  | page 10   |
| <b>Table S4.</b> P-values and FDR derived from pathway analysis of SO <sub>WT</sub> <i>vs</i> TA <sub>WT</sub>                                                    | page 11   |
| <b>Table S5.</b> P-values and FDR derived from pathway analysis of SO <sub>WT</sub> <i>vs</i> SO <sub>KO</sub>                                                    | page 12   |
| <b>Table S6.</b> P-values and FDR derived from pathway analysis of TA <sub>WT</sub> <i>vs</i> TA <sub>KO</sub>                                                    | page 13   |

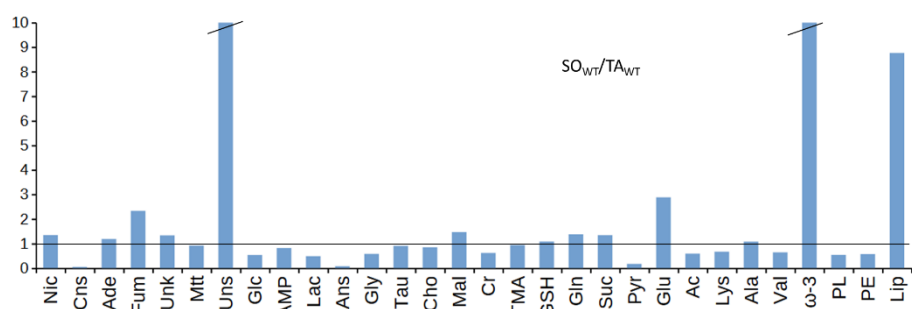

**Figure S1.**  $SO_{WT}/TA_{WT}$  fold change (FC). FC for Uns is about 20 and for  $\omega$ -3 very high because the triplet at 0.98 ppm in  $TA_{WT}$  CPMG spectra is absent.

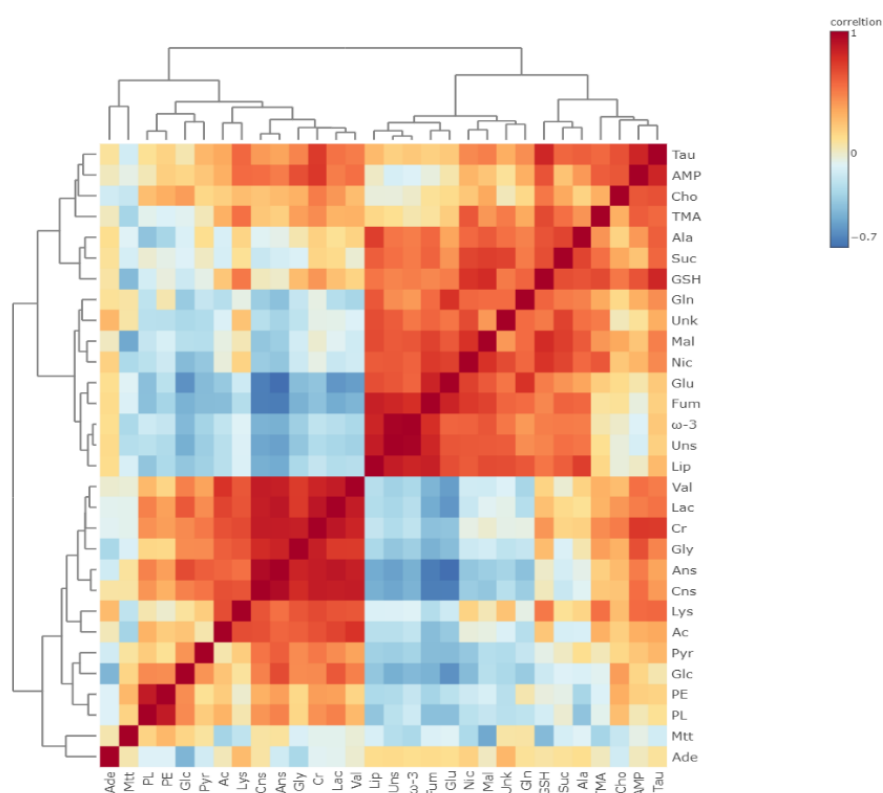

**Figure S2:** Feature correlation heatmap for  $SO_{WT}$  and  $TA_{WT}$  classes.

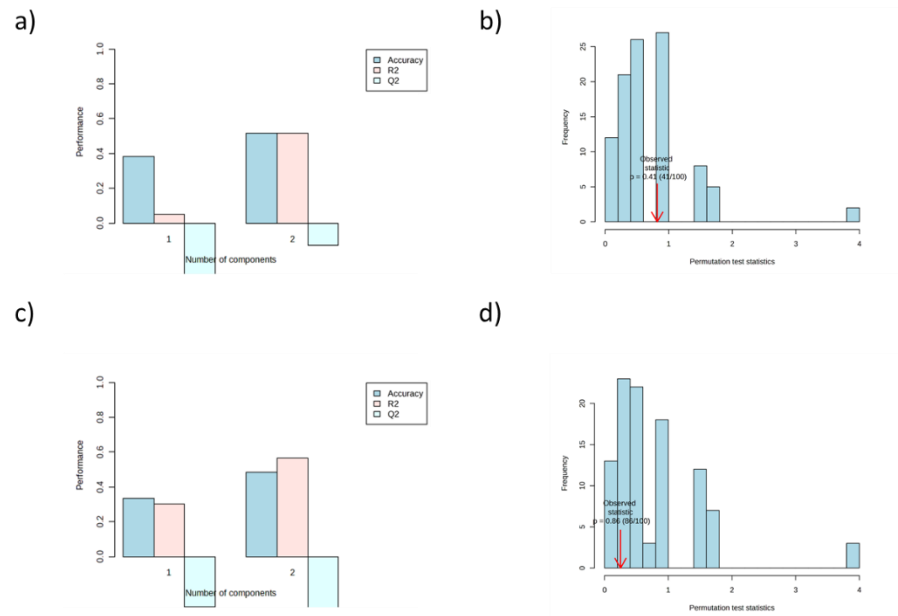

Figure S3. PLS-DA (5-fold) cross validation (a and c) and permutation tests (b and d) for  $SO_{KO}$  vs  $SO_{WT}$  (a and b) and for  $TA_{KO}$  vs  $TA_{WT}$  (c and d).

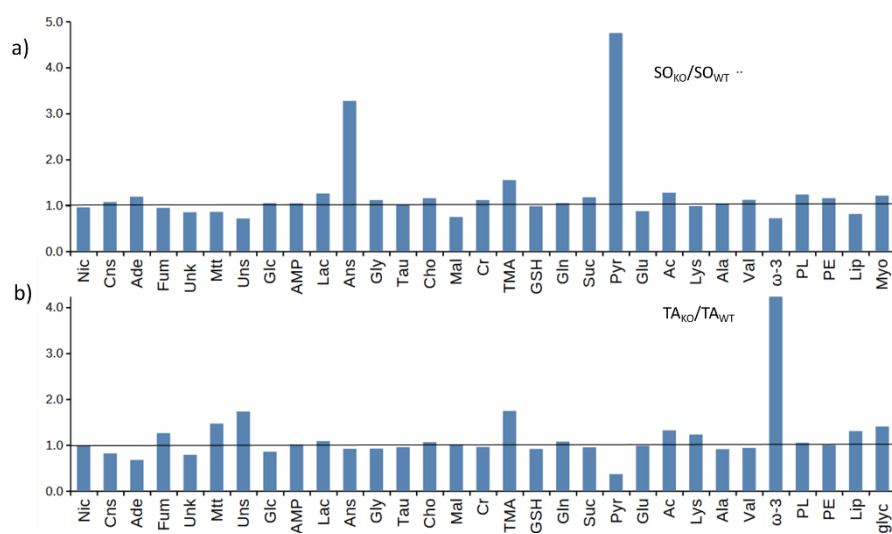

**Figure S4.** Fold change analysis for a)  $SO_{KO}/SO_{WT}$  and b)  $TA_{KO}/TA_{WT}$ .

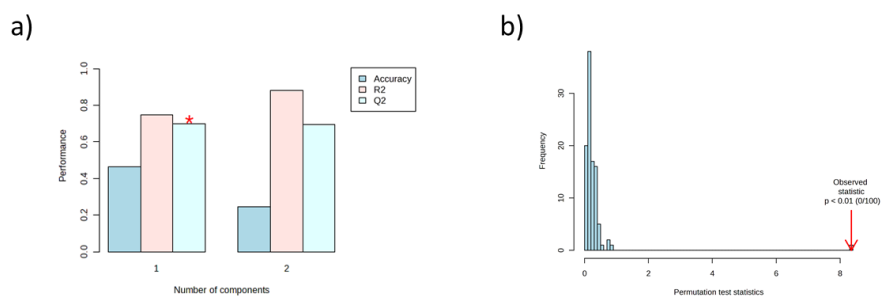

**Figure S5.** PLS-DA (5-fold) cross validation (a) and permutation test (b) for  $SO_{KO}$ ,  $SO_{WT}$ ,  $TA_{KO}$  and  $TA_{WT}$  classes.

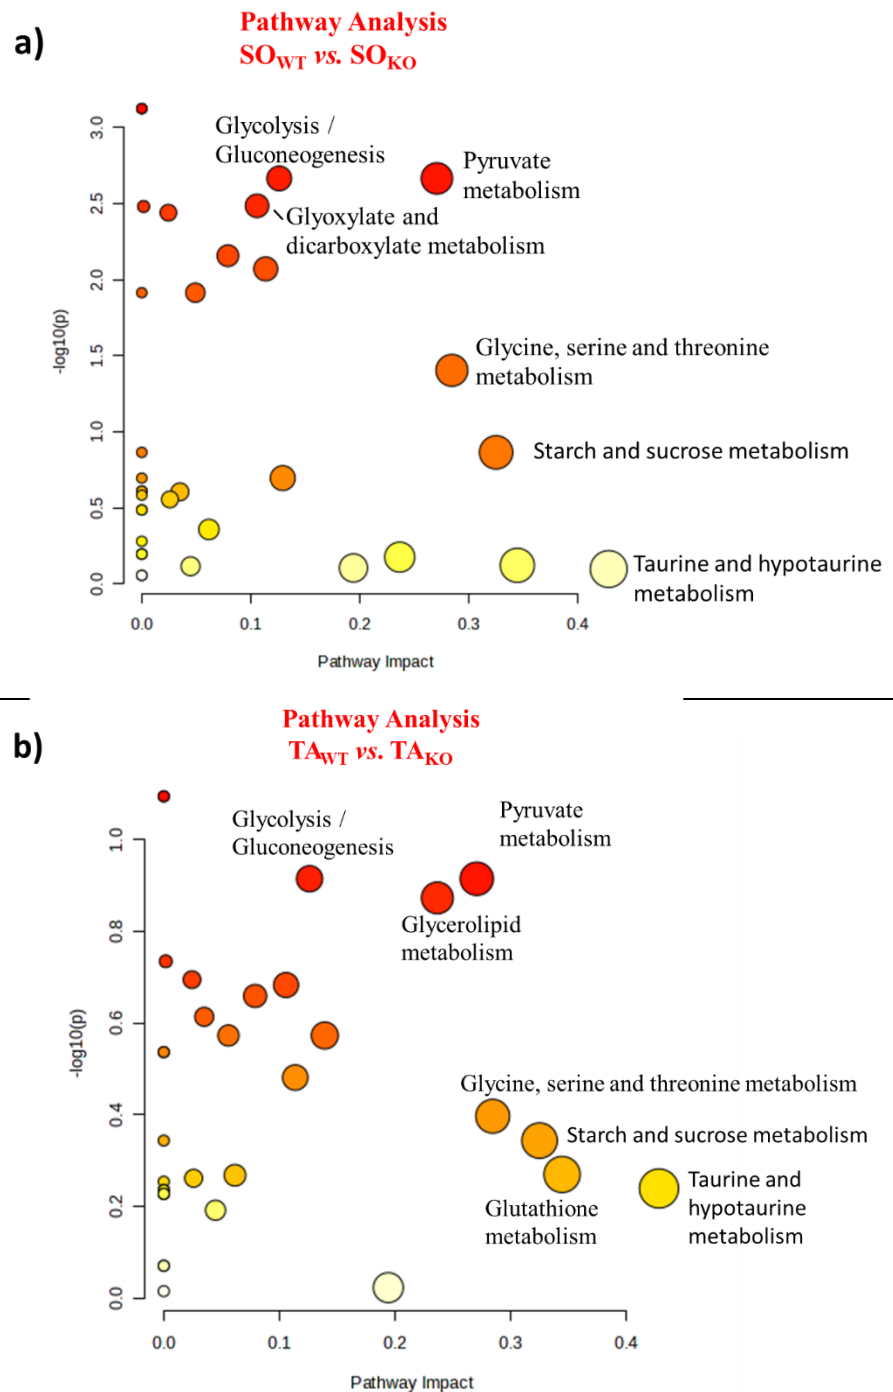

**Figure S6.** Pathway analysis showing the comparison between WT and *Pin1* KO metabolism in a) SO and b) TA muscles. P-values are reported in Tables S5 and S6.

**Table S1.** List of  $^1\text{H}$  and  $^{13}\text{C}$  chemical shifts ( $\delta$ , ppm)<sup>a</sup> of metabolites found in TA and SO muscles.

|           | Metabolites <sup>b</sup> | $\delta^1\text{H}^a$ | Assignment                           |        |
|-----------|--------------------------|----------------------|--------------------------------------|--------|
| <b>1</b>  | fatty acids (Lip)        | 0.91                 | $\text{CH}_3$                        |        |
|           |                          | ( $\omega$ -3)       | $\text{CH}_3^c$                      |        |
|           |                          | 1.37–1.30            | $(\text{CH}_2)_n$                    |        |
|           |                          | 1.60                 | $\text{CH}_2\text{-CH}_2\text{-C=O}$ |        |
|           |                          | 2.07–2.04            | $\text{CH}_2\text{CH=CH}$            |        |
|           |                          | 2.27                 | $\text{CH}_2\text{-C=O}$             |        |
|           |                          | 2.81–2.78            | $=\text{CH-CH}_2\text{-CH=}$         |        |
|           | (Uns)                    | 5.30                 | $-\text{CH=CH-}$                     |        |
| <b>2</b>  | leucine                  | 0.96                 | $\delta\text{-CH}_3$                 | traces |
|           |                          | 0.97                 | $\delta\text{-CH}_3$                 |        |
|           |                          | 1.71                 | $\beta\text{-CH}_2$                  |        |
|           |                          | nd                   | $\gamma\text{-CH}$                   |        |
|           |                          | nd                   | $\alpha\text{-CH}$                   |        |
|           |                          |                      |                                      |        |
| <b>3</b>  | valine (Val)             | 0.99 (d)             | $\gamma\text{-CH}_3$                 |        |
|           |                          | 1.04 (d)             | $\gamma\text{-CH}_3$                 |        |
|           |                          | 2.28                 | $\beta\text{-CH}$                    |        |
|           |                          | nd                   | $\alpha\text{-CH}$                   |        |
| <b>4</b>  | lactate (Lac)            | 1.33 (d)             | $\text{CH}_3$                        |        |
|           |                          | 4.11 (q)             | $\text{CH}$                          |        |
| <b>5</b>  | alanine (Ala)            | 1.48                 | $\text{CH}_3$                        |        |
|           |                          | 3.78                 | $\alpha\text{ CH}$                   |        |
| <b>6</b>  | lysine (Lys)             | nd                   | $\gamma\text{-CH}_2$                 |        |
|           |                          | 1.72                 | $\delta\text{-CH}_2$                 |        |
|           |                          | 1.90                 | $\beta\text{-CH}_2$                  |        |
|           |                          | 3.03                 | $\varepsilon\text{-CH}_2$            |        |
|           |                          | d                    | $\alpha\text{-CH}$                   |        |
| <b>7</b>  | acetate (Ac)             | 1.92 (s)             | $\text{CH}_3$                        |        |
| <b>8</b>  | glutamate (Glu)          | 2.13, 2.07           | $\beta\text{-CH}_2$                  |        |
|           |                          | 2.35                 | $\gamma\text{-CH}_2$                 |        |
|           |                          | d                    | $\alpha\text{-CH}$                   |        |
| <b>9</b>  | glutamine (Gln)          | 2.14                 | $\beta\text{-CH}_2$                  |        |
|           |                          | 2.45                 | $\gamma\text{-CH}_2$                 |        |
|           |                          | d                    | $\alpha\text{-CH}$                   |        |
| <b>10</b> | pyruvate (Pyr)           | 2.38 (s)             | $\text{CH}_3$                        |        |
| <b>11</b> | succinate (Suc)          | 2.41 (s)             | $\text{CH}_2$                        |        |
| <b>12</b> | glutathione (GSH)        | 2.17                 | $\beta\text{-CH}_{2\text{glu}}$      |        |
|           |                          | 2.56                 | $\gamma\text{-CH}_{2\text{glu}}$     |        |
|           |                          | 2.96                 | $\beta\text{-CH}_{2\text{cys}}$      |        |

|    |                         |            |                                  |        |
|----|-------------------------|------------|----------------------------------|--------|
|    |                         | 4.58       | $\alpha$ -CH <sub>cys</sub>      |        |
| 13 | aspartate               | 2.70, 2.65 | $\beta$ -CH <sub>2</sub>         | traces |
|    |                         | nd         | $\alpha$ -CH                     |        |
| 14 | trimethylamine (TMA)    | 2.90 (s)   | CH <sub>3</sub>                  |        |
| 15 | creatine (Cr)           | 3.03 (s)   | CH <sub>3</sub>                  |        |
|    |                         | 3.94 (s)   | CH <sub>2</sub>                  |        |
| 16 | malonate (Mal)          | 3.12 (s)   | CH <sub>2</sub>                  |        |
| 17 | carnosine (Cns)         | 2.70       | CH <sub>2</sub> C=O              |        |
|    |                         | 3.23       | CH <sub>2</sub> N                |        |
|    |                         | 3.27, 3.09 | CH <sub>2</sub> CH               |        |
|    |                         | 4.51       | CH                               |        |
|    |                         | 7.23       | 5-CH                             |        |
|    |                         | 8.55-8.44  | 2-CH                             |        |
| 18 | anserine (Ans)          | 2.70       | CH <sub>2</sub> CO               |        |
|    |                         | 3.23       | CH <sub>2</sub> N                |        |
|    |                         | 3.24, 3.08 | CH <sub>2</sub> CH               |        |
|    |                         | 3.84       | CH <sub>3</sub>                  |        |
|    |                         | 4.52       | CH                               |        |
|    |                         | 7.23       | 5-CH                             |        |
|    |                         | 8.58-8.50  | 2-CH                             |        |
| 19 | choline (Cho)           | 3.20 (s)   | N(CH <sub>3</sub> ) <sub>3</sub> |        |
|    |                         | 3.50       | NCH <sub>2</sub>                 |        |
|    |                         | 4.06       | OCH <sub>2</sub>                 |        |
| 20 | phosphocholine          | 3.23 (s)   | N(CH <sub>3</sub> ) <sub>3</sub> | traces |
|    |                         | 3.60       | NCH <sub>2</sub>                 |        |
|    |                         | 4.15       | OCH <sub>2</sub>                 |        |
| 21 | glycerophosphocholine   | 3.24 (s)   | N(CH <sub>3</sub> ) <sub>3</sub> | traces |
| 22 | phospholipids (PL)      | 3.26       | N(CH <sub>3</sub> ) <sub>3</sub> | traces |
| 23 | taurine (Tau)           | 3.42 (t)   | N-CH <sub>2</sub>                |        |
|    |                         | 3.26 (t)   | S-CH <sub>2</sub>                |        |
| 24 | glycine (Gly)           | 3.56 (s)   | CH <sub>2</sub>                  |        |
| 25 | $\beta$ -glucose (Glc)  | 3.25       | 2-CH                             |        |
|    |                         | 3.41       | 4-CH                             |        |
|    |                         | 3.47       | 5-CH                             |        |
|    |                         | 3.50       | 3-CH                             |        |
|    |                         | 3.90, 3.73 | 6-CH <sub>2</sub>                |        |
|    |                         | 4.65 (d)   | 1-CH                             |        |
| 26 | $\alpha$ -glucose (Glc) | 3.42       | 4-CH                             |        |
|    |                         | 3.54       | 2-CH                             |        |
|    |                         | 3.72       | 3-CH                             |        |
|    |                         | 3.83       | 5-CH                             |        |
|    |                         | 3.85, 3.77 | 6 CH <sub>2</sub>                |        |
|    |                         | 5.23 (d)   | 1-CH                             |        |
| 27 | maltotriose (Mtt)       | 3.58       | 2'-CH and 2''-CH                 |        |

|           |                      |                          |                    |        |
|-----------|----------------------|--------------------------|--------------------|--------|
|           |                      | 3.72                     |                    |        |
|           |                      | 5.44                     | 1'-CH and 1''-CH   |        |
| <b>28</b> | unknown (Unk)        | 4.08                     |                    |        |
|           |                      | 5.63                     |                    |        |
| <b>29</b> | AMP                  | 4.04                     | 5'-CH <sub>2</sub> |        |
|           |                      | 4.38                     | 4'-CH              |        |
|           |                      | 4.52                     | 3'-CH              |        |
|           |                      | 4.80 (t)                 | 2'-CH              |        |
|           |                      | 6.16 (d)                 | 1'-CH              |        |
|           |                      | 8.23                     | 2-CH               |        |
|           |                      | 8.59 (SO) 8.59-8.53 (TA) | 8-CH               |        |
| <b>30</b> | adenine (Ade)        | 8.19                     | 2-CH               |        |
|           |                      | 8.36                     | 8-CH               |        |
| <b>31</b> | glycerol bound in TG | 4.31, 4.10               | CH <sub>2</sub>    |        |
|           |                      | 5.24                     | CH                 |        |
| <b>32</b> | free glycerol (glyc) | 3.65, 3.55               | CH <sub>2</sub>    |        |
|           |                      | 3.78                     | CH                 |        |
| <b>33</b> | myo-inositol (Myo)   | 3.53                     | 1,3-CH             |        |
|           |                      | 4.06                     | 2-CH               |        |
|           |                      | 3.62                     | 4,6-CH             |        |
|           |                      | 3.27                     | 5-CH               |        |
| <b>34</b> | fumarate (Fum)       | 6.52                     | CH                 |        |
| <b>35</b> | tyrosine (Tyr)       | 6.89                     | 3-CH               | traces |
|           |                      | 7.18                     | 2-CH               |        |
| <b>36</b> | phenylalanine (Phe)  | 7.32                     | H- <i>o</i>        | traces |
|           |                      | 7.37                     | H- <i>p</i>        |        |
|           |                      | 7.42                     | H- <i>m</i>        |        |
| <b>37</b> | nicotinamide (Nic)   | 7.59                     | 5-CH               |        |
|           |                      | 8.23                     | 4-CH               |        |
|           |                      | 8.70 (d)                 | 6-CH               |        |
|           |                      | 8.94                     | 2-CH               |        |

<sup>a</sup> <sup>1</sup>H chemical shifts refer to Ala doublet at 1.48 ppm. (s) singlet, (d) doublet, (t) triplet.

<sup>b</sup> abbreviations used in the text are reported in parentheses.

<sup>c</sup> CH<sub>3</sub> from polyunsaturated ω-3 fatty acid chains.

<sup>d</sup> contributes to the peak at 3.78 ppm.



Table S2. Raw and FDR corrected p-values from two-tailed t-test on deconvoluted metabolites signals.

|       | SO <sub>WT</sub> vs TA <sub>WT</sub> |         | SO <sub>WT</sub> vs SO <sub>KO</sub> |         | TA <sub>WT</sub> vs TA <sub>KO</sub> |         |
|-------|--------------------------------------|---------|--------------------------------------|---------|--------------------------------------|---------|
|       | FDR corrected                        |         | FDR corrected                        |         | FDR corrected                        |         |
|       | raw p-value                          | p-value | raw p-value                          | p-value | raw p-value                          | p-value |
| Nic   | 0.0176                               | 0.0377  | 0.7840                               | 0.9273  | 0.9485                               | 0.9890  |
| Cns   | 0.0000001                            | 2.0E-06 | 0.8077                               | 0.9273  | 0.1936                               | 0.6667  |
| Ade   | 0.4649                               | 0.5364  | 0.3240                               | 0.8420  | 0.1891                               | 0.6667  |
| Fum   | 0.00013                              | 0.0005  | 0.6655                               | 0.9273  | 0.1339                               | 0.6667  |
| Unk   | 0.0919                               | 0.1253  | 0.5769                               | 0.9273  | 0.1534                               | 0.6667  |
| Mtt   | 0.6462                               | 0.6685  | 0.2715                               | 0.8420  | 0.2980                               | 0.7324  |
| Uns   | 0.0038                               | 0.0115  | 0.7007                               | 0.9273  | 0.3047                               | 0.7324  |
| Glc   | 0.00014                              | 0.00054 | 0.1363                               | 0.8420  | 0.4531                               | 0.7982  |
| AMP   | 0.0904                               | 0.1253  | 0.6303                               | 0.9273  | 0.9337                               | 0.9890  |
| Lac   | 0.000002                             | 0.00002 | 0.3632                               | 0.8662  | 0.4391                               | 0.7982  |
| Ans   | 1E-10                                | 2.8E-09 | 0.0582                               | 0.5579  | 0.3837                               | 0.7982  |
| Gly   | 0.00043                              | 0.0014  | 0.5237                               | 0.9273  | 0.5570                               | 0.7982  |
| Tau   | 0.3196                               | 0.3862  | 0.7972                               | 0.9273  | 0.5764                               | 0.7982  |
| Cho   | 0.2360                               | 0.3079  | 0.2779                               | 0.8420  | 0.5476                               | 0.7982  |
| Mal   | 0.0624                               | 0.1040  | 0.2604                               | 0.8420  | 0.9655                               | 0.9890  |
| Cr    | 0.00011                              | 0.00054 | 0.4848                               | 0.9273  | 0.6741                               | 0.8707  |
| TMA   | 0.8266                               | 0.8266  | 0.0720                               | 0.5579  | 0.1754                               | 0.6667  |
| GSH   | 0.5870                               | 0.6289  | 0.7208                               | 0.9273  | 0.4702                               | 0.7982  |
| Gln   | 0.0328                               | 0.0579  | 0.2453                               | 0.8420  | 0.5922                               | 0.7982  |
| Suc   | 0.3219                               | 0.3862  | 0.3259                               | 0.8420  | 0.8500                               | 0.9890  |
| Pyr   | 0.0228                               | 0.0457  | 0.00075                              | 0.0232  | 0.0804                               | 0.6667  |
| Glu   | 0.00001                              | 0.00006 | 0.7968                               | 0.9273  | 0.9270                               | 0.9890  |
| Ac    | 0.0134                               | 0.0309  | 0.0688                               | 0.5579  | 0.1371                               | 0.6667  |
| Lys   | 0.0671                               | 0.1060  | 0.8766                               | 0.9371  | 0.2905                               | 0.7324  |
| Ala   | 0.5320                               | 0.5912  | 0.7312                               | 0.9273  | 0.3943                               | 0.7982  |
| Val   | 0.00002                              | 0.00010 | 0.6356                               | 0.9273  | 0.5815                               | 0.7982  |
| ω-3   | 0.0111                               | 0.0300  | 0.7778                               | 0.9273  | 0.0701                               | 0.6667  |
| PL    | 0.0290                               | 0.0543  | 0.8636                               | 0.9371  | 0.7977                               | 0.9890  |
| PE    | 0.0788                               | 0.1182  | 0.9146                               | 0.9450  | 0.9890                               | 0.9890  |
| Lip   | 0.0120                               | 0.0300  | 0.9492                               | 0.9492  | 0.3072                               | 0.7324  |
| Myo   | -                                    | -       | 0.2012                               | 0.8420  | -                                    | -       |
| glycl | -                                    | -       | -                                    | -       | 0.1762                               | 0.6667  |

**Table S3.** Post-hoc test for parametric ANOVA on deconvoluted signals of the four classes: 0 (SO<sub>WT</sub>), 1 (SO<sub>KO</sub>), 2 (TA<sub>WT</sub>) and 3 (TA<sub>KO</sub>)

|     | f-value | p-value  | -log10(p) | FDR corrected<br>p-value | Fisher's LSD |       |       |       |
|-----|---------|----------|-----------|--------------------------|--------------|-------|-------|-------|
| Ans | 116.94  | 2.52E-17 | 16.60     | 7.55E-16                 | 2 - 0        | 3 - 0 | 2 - 1 | 3 - 1 |
| Cns | 56.152  | 7.57E-13 | 12.12     | 1.14E-11                 | 2 - 0        | 3 - 0 | 2 - 1 | 3 - 1 |
| Glu | 30.154  | 1.89E-09 | 8.72      | 1.89E-08                 | 0 - 2        | 0 - 3 | 1 - 2 | 1 - 3 |
| Lac | 23.496  | 3.17E-08 | 7.50      | 2.37E-07                 | 2 - 0        | 3 - 0 | 2 - 1 | 3 - 1 |
| Fum | 17.881  | 5.37E-07 | 6.27      | 3.22E-06                 | 0 - 2        | 0 - 3 | 1 - 2 | 1 - 3 |
| Cr  | 11.854  | 2.20E-05 | 4.66      | 1.10E-04                 | 2 - 0        | 3 - 0 | 2 - 1 | 3 - 1 |
| Gly | 8.2834  | 3.21E-04 | 3.49      | 1.29E-03                 | 2 - 0        | 3 - 0 | 2 - 1 | 3 - 1 |
| Uns | 8.1493  | 3.59E-04 | 3.45      | 1.29E-03                 | 0 - 2        | 0 - 3 | 1 - 2 | 1 - 3 |
| Ac  | 8.0097  | 4.02E-04 | 3.40      | 1.29E-03                 | 2 - 0        | 3 - 0 | 3 - 1 |       |
| Val | 7.9334  | 4.29E-04 | 3.37      | 1.29E-03                 | 2 - 0        | 3 - 0 | 2 - 1 | 3 - 1 |
| Glc | 6.7406  | 1.19E-03 | 2.93      | 3.24E-03                 | 2 - 0        | 3 - 0 | 2 - 1 | 3 - 1 |
| ω-3 | 6.1761  | 1.96E-03 | 2.71      | 4.91E-03                 | 0 - 2        | 0 - 3 | 1 - 2 | 1 - 3 |
| Gln | 6.0398  | 2.22E-03 | 2.65      | 5.13E-03                 | 0 - 2        | 1 - 2 | 1 - 3 |       |
| Lip | 5.7664  | 2.86E-03 | 2.54      | 6.12E-03                 | 0 - 2        | 0 - 3 | 1 - 2 | 1 - 3 |
| Lys | 5.5371  | 3.54E-03 | 2.45      | 7.08E-03                 | 3 - 0        | 2 - 1 | 3 - 1 |       |
| Nic | 4.563   | 9.03E-03 | 2.04      | 1.69E-02                 | 0 - 2        | 0 - 3 | 1 - 2 | 1 - 3 |
| Pyr | 4.1012  | 1.43E-02 | 1.84      | 2.53E-02                 | 1 - 0        | 2 - 0 | 2 - 3 |       |
| Unk | 3.6048  | 2.38E-02 | 1.62      | 3.85E-02                 | 0 - 3        | 1 - 3 |       |       |
| PL  | 3.5811  | 2.44E-02 | 1.61      | 3.85E-02                 | 2 - 0        | 3 - 0 | 2 - 1 | 3 - 1 |
| Ade | 3.4395  | 2.83E-02 | 1.55      | 4.24E-02                 | 0 - 3        | 1 - 3 |       |       |
| PE  | 2.9955  | 4.52E-02 | 1.34      | 6.46E-02                 | 2 - 0        | 3 - 0 | 2 - 1 | 3 - 1 |
| Suc | 2.4221  | 8.40E-02 | 1.08      | 1.15E-01                 | 1 - 2        | 1 - 3 |       |       |
| AMP | 1.9305  | 1.45E-01 | 0.84      | 1.88E-01                 |              |       |       |       |
| Mtt | 1.8665  | 1.55E-01 | 0.81      | 1.94E-01                 | 3 - 1        |       |       |       |
| TMA | 1.7419  | 1.78E-01 | 0.75      | 2.14E-01                 |              |       |       |       |
| Mal | 1.5072  | 2.31E-01 | 0.64      | 2.67E-01                 |              |       |       |       |
| Ala | 1.3438  | 2.78E-01 | 0.56      | 3.08E-01                 |              |       |       |       |
| GSH | 1.158   | 3.41E-01 | 0.47      | 3.61E-01                 |              |       |       |       |
| Cho | 1.1366  | 3.49E-01 | 0.46      | 3.61E-01                 |              |       |       |       |
| Tau | 0.4105  | 7.47E-01 | 0.13      | 7.47E-01                 |              |       |       |       |

**Table S4.** P-values and FDR derived from pathway analysis of SO<sub>WT</sub> vs TA<sub>WT</sub>

|                                                | Total<br>Cmpd | Hits | Raw p      | -log10(p) | Holm<br>adjust | FDR        | Impact  |
|------------------------------------------------|---------------|------|------------|-----------|----------------|------------|---------|
| Histidine metabolism                           | 16            | 3    | 6.8298e-11 | 10.166    | 2.1855e-09     | 2.1855e-09 | 0.13934 |
| beta-Alanine metabolism                        | 21            | 2    | 1.3139e-09 | 8.8814    | 0.00004073     | 2.1022e-08 | 0.05597 |
| Porphyrin metabolism                           | 31            | 2    | 3.5094e-08 | 7.4548    | 1.0528e-06     | 3.4345e-07 | 0       |
| Glycolysis / Gluconeogenesis                   | 26            | 4    | 4.2932e-08 | 7.3672    | 0.001245       | 3.4345e-07 | 0.12637 |
| Arginine and proline metabolism                | 36            | 3    | 0.0002104  | 6.677     | 5.8911e-06     | 1.3465e-06 | 0.02442 |
| Glutathione metabolism                         | 28            | 3    | 5.0176e-07 | 6.2995    | 1.3548e-05     | 2.6761e-06 | 0.36435 |
| Glyoxylate and dicarboxylate metabolism        | 32            | 5    | 6.4209e-07 | 6.1924    | 1.6694e-05     | 2.9353e-06 | 0.10582 |
| Pyruvate metabolism                            | 23            | 3    | 6.7939e-06 | 5.1679    | 0.00016985     | 2.7176e-05 | 0.27088 |
| Valine, leucine and isoleucine<br>degradation  | 40            | 1    | 1.5834e-05 | 4.8004    | 0.00038002     | 4.6063e-05 | 0       |
| Valine, leucine and isoleucine<br>biosynthesis | 8             | 1    | 1.5834e-05 | 4.8004    | 0.00038002     | 4.6063e-05 | 0       |
| Pantothenate and CoA biosynthesis              | 20            | 1    | 1.5834e-05 | 4.8004    | 0.00038002     | 4.6063e-05 | 0       |
| Glycerolipid metabolism                        | 16            | 1    | 0.0001332  | 3.8755    | 0.0027972      | 0.00031484 | 0.23676 |
| Galactose metabolism                           | 27            | 1    | 0.0001332  | 3.8755    | 0.0027972      | 0.00031484 | 0       |
| Glycine, serine and threonine metabolism       | 34            | 4    | 0.00013774 | 3.8609    | 0.0027972      | 0.00031484 | 0.28464 |
| Lipoic acid metabolism                         | 28            | 2    | 0.00034154 | 3.4666    | 0.0061478      | 0.00072862 | 0.0017  |
| Arginine biosynthesis                          | 14            | 2    | 0.00044987 | 3.3469    | 0.0076478      | 0.00084681 | 0.11675 |
| Nitrogen metabolism                            | 6             | 2    | 0.00044987 | 3.3469    | 0.0076478      | 0.00084681 | 0       |
| Butanoate metabolism                           | 15            | 2    | 0.00055862 | 3.2529    | 0.0083794      | 0.00099311 | 0       |
| Alanine, aspartate and glutamate<br>metabolism | 28            | 5    | 0.0017998  | 2.7448    | 0.025198       | 0.0030313  | 0.3109  |
| Primary bile acid biosynthesis                 | 46            | 2    | 0.005003   | 2.3008    | 0.065038       | 0.0080047  | 0.04478 |
| Nicotinate and nicotinamide metabolism         | 15            | 1    | 0.017601   | 1.7545    | 0.21121        | 0.02682    | 0.1943  |
| Cysteine and methionine metabolism             | 33            | 1    | 0.022833   | 1.6414    | 0.25116        | 0.031768   | 0       |
| Tyrosine metabolism                            | 42            | 1    | 0.022833   | 1.6414    | 0.25116        | 0.031768   | 0       |
| Pyrimidine metabolism                          | 39            | 1    | 0.032816   | 1.4839    | 0.29535        | 0.043755   | 0       |
| Purine metabolism                              | 71            | 3    | 0.037946   | 1.4208    | 0.30357        | 0.048571   | 0.06162 |
| Citrate cycle (TCA cycle)                      | 20            | 2    | 0.041809   | 1.3787    | 0.30357        | 0.051457   | 0.07907 |
| Lysine degradation                             | 30            | 1    | 0.067127   | 1.1731    | 0.40276        | 0.076716   | 0       |
| Biotin metabolism                              | 10            | 1    | 0.067127   | 1.1731    | 0.40276        | 0.076716   | 0       |
| Glycerophospholipid metabolism                 | 36            | 1    | 0.23604    | 0.62702   | 0.94415        | 0.26046    | 0.02582 |
| Taurine and hypotaurine metabolism             | 8             | 1    | 0.31961    | 0.49538   | 0.95883        | 0.33225    | 0.42857 |
| Propanoate metabolism                          | 22            | 1    | 0.32186    | 0.49233   | 0.95883        | 0.33225    | 0       |
| Selenocompound metabolism                      | 20            | 1    | 0.53204    | 0.27406   | 0.95883        | 0.53204    | 0       |

**Table S5.** P-values and FDR derived from pathway analysis of SO<sub>WT</sub> vs SO<sub>KO</sub>.

|                                             | Total<br>Cmpd | Hits | Raw p      | -log10(p) | Holm<br>adjust | FDR      | Impact  |
|---------------------------------------------|---------------|------|------------|-----------|----------------|----------|---------|
| Cysteine and methionine metabolism          | 33            | 1    | 0.00074946 | 3.1253    | 0.025482       | 0.01271  | 0       |
| Tyrosine metabolism                         | 42            | 1    | 0.00074946 | 3.1253    | 0.025482       | 0.01271  | 0       |
| Glycolysis / Gluconeogenesis                | 26            | 4    | 0.0011214  | 2.9502    | 0.035886       | 0.01271  | 0.12637 |
| Pyruvate metabolism                         | 23            | 3    | 0.0021568  | 2.6662    | 0.066859       | 0.018332 | 0.27088 |
| Lipoic acid metabolism                      | 28            | 2    | 0.003299   | 2.4816    | 0.098969       | 0.022433 | 0.0017  |
| Citrate cycle (TCA cycle)                   | 20            | 2    | 0.0069501  | 2.158     | 0.20155        | 0.039384 | 0.07907 |
| beta-Alanine metabolism                     | 21            | 1    | 0.01216    | 1.9151    | 0.34048        | 0.059063 | 0       |
| Glyoxylate and dicarboxylate metabolism     | 32            | 5    | 0.02143    | 1.669     | 0.57861        | 0.091077 | 0.10582 |
| Arginine and proline metabolism             | 36            | 3    | 0.034156   | 1.4665    | 0.88804        | 0.12903  | 0.02442 |
| Glycine, serine and threonine metabolism    | 34            | 4    | 0.039384   | 1.4047    | 0.9846         | 0.13391  | 0.28464 |
| Histidine metabolism                        | 16            | 2    | 0.045732   | 1.3398    | 1              | 0.14135  | 0.04918 |
| Alanine, aspartate and glutamate metabolism | 28            | 5    | 0.065019   | 1.187     | 1              | 0.18422  | 0.3109  |
| Inositol phosphate metabolism               | 30            | 1    | 0.20119    | 0.69639   | 1              | 0.48861  | 0.12939 |
| Ascorbate and aldarate metabolism           | 10            | 1    | 0.20119    | 0.69639   | 1              | 0.48861  | 0       |
| Pyrimidine metabolism                       | 39            | 1    | 0.24529    | 0.61032   | 1              | 0.55598  | 0       |
| Glycerophospholipid metabolism              | 36            | 1    | 0.27787    | 0.55616   | 1              | 0.59047  | 0.02582 |
| Propanoate metabolism                       | 22            | 1    | 0.32593    | 0.48687   | 1              | 0.65187  | 0       |
| Galactose metabolism                        | 27            | 2    | 0.37435    | 0.42672   | 1              | 0.7071   | 0       |
| Arginine biosynthesis                       | 14            | 2    | 0.4313     | 0.36522   | 1              | 0.70865  | 0.11675 |
| Nitrogen metabolism                         | 6             | 2    | 0.4313     | 0.36522   | 1              | 0.70865  | 0       |
| Purine metabolism                           | 71            | 3    | 0.43769    | 0.35883   | 1              | 0.70865  | 0.06162 |
| Butanoate metabolism                        | 15            | 2    | 0.59184    | 0.22779   | 1              | 0.86444  | 0       |
| Valine, leucine and isoleucine degradation  | 40            | 1    | 0.63562    | 0.1968    | 1              | 0.86444  | 0       |
| Valine, leucine and isoleucine biosynthesis | 8             | 1    | 0.63562    | 0.1968    | 1              | 0.86444  | 0       |
| Pantothenate and CoA biosynthesis           | 20            | 1    | 0.63562    | 0.1968    | 1              | 0.86444  | 0       |
| Glycerolipid metabolism                     | 16            | 1    | 0.66553    | 0.17683   | 1              | 0.8703   | 0.23676 |
| Selenocompound metabolism                   | 20            | 1    | 0.73124    | 0.13594   | 1              | 0.87431  | 0       |
| Porphyryn metabolism                        | 31            | 2    | 0.74814    | 0.12602   | 1              | 0.87431  | 0       |
| Primary bile acid biosynthesis              | 46            | 2    | 0.7645     | 0.11662   | 1              | 0.87431  | 0.04478 |
| Nicotinate and nicotinamide metabolism      | 15            | 1    | 0.78404    | 0.10566   | 1              | 0.87431  | 0.1943  |
| Taurine and hypotaurine metabolism          | 8             | 1    | 0.79717    | 0.098452  | 1              | 0.87431  | 0.42857 |
| Glutathione metabolism                      | 28            | 3    | 0.85275    | 0.069179  | 1              | 0.87662  | 0.36435 |
| Lysine degradation                          | 30            | 1    | 0.87662    | 0.05719   | 1              | 0.87662  | 0       |
| Biotin metabolism                           | 10            | 1    | 0.87662    | 0.05719   | 1              | 0.87662  | 0       |

**Table S6.** P-values and FDR derived from pathway analysis of TA<sub>WT</sub> vs TA<sub>KO</sub>

|                                             | Total<br>Cmpd | Hits | Raw p    | -log10(p) | Holm<br>adjust | FDR     | Impact  |
|---------------------------------------------|---------------|------|----------|-----------|----------------|---------|---------|
| Cysteine and methionine metabolism          | 33            | 1    | 0.080383 | 1.0948    | 1              | 0.78959 | 0       |
| Tyrosine metabolism                         | 42            | 1    | 0.080383 | 1.0948    | 1              | 0.78959 | 0       |
| Pyruvate metabolism                         | 23            | 3    | 0.12163  | 0.91497   | 1              | 0.78959 | 0.27088 |
| Glycerolipid metabolism                     | 16            | 1    | 0.13391  | 0.8732    | 1              | 0.78959 | 0.23676 |
| Galactose metabolism                        | 27            | 1    | 0.13391  | 0.8732    | 1              | 0.78959 | 0       |
| Glycolysis / Gluconeogenesis                | 26            | 4    | 0.16507  | 0.78233   | 1              | 0.78959 | 0.12637 |
| Lipoic acid metabolism                      | 28            | 2    | 0.18414  | 0.73486   | 1              | 0.78959 | 0.0017  |
| Citrate cycle (TCA cycle)                   | 20            | 2    | 0.21916  | 0.65924   | 1              | 0.78959 | 0.07907 |
| beta-Alanine metabolism                     | 21            | 2    | 0.26731  | 0.57298   | 1              | 0.78959 | 0.05597 |
| Lysine degradation                          | 30            | 1    | 0.29053  | 0.53681   | 1              | 0.78959 | 0       |
| Biotin metabolism                           | 10            | 1    | 0.29053  | 0.53681   | 1              | 0.78959 | 0       |
| Glyoxylate and dicarboxylate metabolism     | 32            | 5    | 0.30569  | 0.51472   | 1              | 0.78959 | 0.10582 |
| Arginine and proline metabolism             | 36            | 3    | 0.35256  | 0.45276   | 1              | 0.78959 | 0.02442 |
| Selenocompound metabolism                   | 20            | 1    | 0.39425  | 0.40423   | 1              | 0.78959 | 0       |
| Glycine, serine and threonine metabolism    | 34            | 4    | 401      | 0.39686   | 1              | 0.78959 | 0.28464 |
| Histidine metabolism                        | 16            | 3    | 0.4334   | 0.36311   | 1              | 0.78959 | 0.13934 |
| Alanine, aspartate and glutamate metabolism | 28            | 5    | 0.46408  | 0.33341   | 1              | 0.78959 | 0.3109  |
| Purine metabolism                           | 71            | 3    | 0.53939  | 0.2681    | 1              | 0.78959 | 0.06162 |
| Glycerophospholipid metabolism              | 36            | 1    | 0.54762  | 0.26152   | 1              | 0.78959 | 0.02582 |
| Taurine and hypotaurine metabolism          | 8             | 1    | 0.5764   | 0.23927   | 1              | 0.78959 | 0.42857 |
| Valine, leucine and isoleucine degradation  | 40            | 1    | 0.58148  | 0.23547   | 1              | 0.78959 | 0       |
| Valine, leucine and isoleucine biosynthesis | 8             | 1    | 0.58148  | 0.23547   | 1              | 0.78959 | 0       |
| Pantothenate and CoA biosynthesis           | 20            | 1    | 0.58148  | 0.23547   | 1              | 0.78959 | 0       |
| Pyrimidine metabolism                       | 39            | 1    | 0.59219  | 0.22754   | 1              | 0.78959 | 0       |
| Primary bile acid biosynthesis              | 46            | 2    | 0.64303  | 0.19177   | 1              | 0.82308 | 0.04478 |
| Glutathione metabolism                      | 28            | 3    | 0.7106   | 0.14837   | 1              | 0.87459 | 0.36435 |
| Arginine biosynthesis                       | 14            | 2    | 0.78466  | 0.10532   | 1              | 0.89676 | 0.11675 |
| Nitrogen metabolism                         | 6             | 2    | 0.78466  | 0.10532   | 1              | 0.89676 | 0       |
| Porphyrin metabolism                        | 31            | 2    | 0.81828  | 0.087099  | 1              | 0.90293 | 0       |
| Propanoate metabolism                       | 22            | 1    | 0.85001  | 0.070576  | 1              | 0.90668 | 0       |
| Nicotinate and nicotinamide metabolism      | 15            | 1    | 0.94851  | 0.022956  | 1              | 0.97376 | 0.1943  |
| Butanoate metabolism                        | 15            | 2    | 0.97376  | 0.011548  | 1              | 0.97376 | 0       |
